# Supplementary material for: Antibody Responses to Cancer Antigens Identify Patients with a Poor Prognosis among HPV-Positive and HPV-Negative Head and Neck Squamous Cell Carcinoma Patients
Source: Oxford University Press journal article supplement (doi:10.1158/1078-0432.ccr-19-1490), 2019-08-23
Supplement: 10780432ccr191490-sup-221869_3_supp_5678093_pvf7ng.xlsx [file 10780432ccr191490-sup-221869_3_supp_5678093_pvf7ng.xlsx]

## Sheet: Sheet1
Table S1: Patient characteristics of patients with non-oropharyngeal primary tumors
		Primary Site												Total Cohort (100%)
		Hypopharynx (16,9%)		Larynx (31,5%)		Oral Cavity (42,3%)		Nasopharynx (1,5%)		Nasal Cavity (5,3%)		Paranasal Sinuses (2,3%)
		n	%	n	%	n	%	n	%	n	%	n	%	n	%
T	1	2	0.0952381	10	0.27027	8	0.153846	0	0	2	0.666667	0	0	22	0.180328
	2	4	0.190476	5	0.135135	19	0.365385	2	0.0952381	2	0.666667	0	0	32	0.262295
	3	6	0.285714	11	0.297297	10	0.192308	0	0	0	0	2	0.666667	29	0.237705
	4	9	0.428571	11	0.297297	15	0.288462	0	0	3	1	1	0.333333	39	0.319672
	Missing	0	0	0	0	0	0	0	0	0	0	0	0	0	0
	Total	21	1	37	1	52	1	2	1	7	1	3	1	122	1
N	0	1	0.047619	23	0.621622	30	0.576923	0	0	5	0.714286	2	0.666667	61	0.5
	1	5	0.238095	7	0.189189	6	0.115385	0	0	1	0.142857	0	0	19	0.155738
	2	12	0.571429	5	0.135135	15	0.288462	2	1	1	0.142857	1	0.333333	36	0.295082
	3	3	0.142857	2	0.0540541	1	0.0192308	0	0	0	0	0	0	6	0.0491803
	Missing	0	0	0	0	0	0	0	0	0	0	0	0	0	0
	Total	21	1	37	1	52	1	2	1	7	1	3	1	122	1
M	0	21	1	37	1	52	1	2	1	7	1	3	1	122	1
	1	0	0	0	0	0	0	0	0	0	0	0	0	0	0
	Total	21	1	37	1	52	1	2	1	7	1	3	1	122	1
Stage	I	0	0	7	0.189189	6	0.115385	0	0	1	0.142857	0	0	14	0.114754
	II	0	0	5	0.135135	11	0.211538	0	0	1	0.142857	0	0	17	0.139344
	III	4	0.190476	11	0.297297	12	0.230769	0	0	1	0.142857	2	0.666667	30	0.245902
	IVA/B	17	0.809524	14	0.378378	23	0.442308	2	1	4	0.571429	1	0.333333	61	0.5
	Missing	0	0	0	0	0	0	0	0	0	0	0	0	0	0
	Total	21	1	37	1	52	1	2	1	7	1	3	1	122	1
HPV status (mol/ser)	HPV negative	18	0.857143	32	0.864865	40	0.769231	2	1	7	1	3	1	102	0.836066
	HPV positive	3	0.142857	5	0.135135	12	0.230769	0	0	0	0	0	0	20	0.163934
	Total	21	1	37	1	52	1	2	1	7	1	3	1	122	1
Treatment approach	surgical	13	0.619048	30	0.810811	46	0.884615	1	0.5	7	1	3	1	100	0.819672
	non-surgical	6	0.285714	7	0.189189	6	0.115385	1	0.5	0	0	0	0	20	0.163934
	Missing	2	0.0952381	0	0	0	0	0	0	0	0	0	0	2	0.0163934
	Total	21	1	37	1	52	1	2	1	7	1	3	1	122	1
Sex	male	18	0.857143	32	0.864865	41	0.788462	1	0.5	5	0.714286	2	0.666667	99	0.811475
	female	3	0.142857	5	0.135135	11	0.211538	1	0.5	2	0.285714	1	0.333333	23	0.188525
	Total	21	1	37	1	52	1	2	1	7	1	3	1	122	1
Smoking	non-smoker	4	0.190476	7	0.189189	15	0.288462	1	0.5	2	0.285714	1	0.333333	30	0.245902
	smoker	15	0.714286	29	0.783784	37	0.711538	1	0.5	5	0.714286	2	0.666667	89	0.729508
	Missing	2	0.0952381	1	0.027027	0	0	0	0	0	0	0	0	3	0.0245902
	Total	21	1	37	1	52	1	2	1	7	1	3	1	122	1
